# Supplementary material
Source: publisher figshare collection journal article supplement (https://sage.figshare.com/ndownloader/files/12461933)
Supplement: Supplementary file 1 [file 12461933]

Supplemental table 1:

Comparison of included (n=512) and excluded patients (n=151) due to incomplete data in one of the procedural time specifications.

|                              | Included patients<br>(n=512) | Excluded patients<br>(n=151) | p-Value |
|------------------------------|------------------------------|------------------------------|---------|
| Gender (female)              | 260<br>(50.8%)               | 72<br>(48.3%)                | 0.64    |
| Age in years<br>(mean±SD)    | 68.2±14.6                    | 69.7±13.5                    | 0.33    |
| NIHSS admission<br>(mean±SD) | 14.6±6.3                     | 14.5±6.5                     | 0.21    |
| NIHSS discharge<br>(mean±SD) | 5.6±6.7                      | 7.1±5.6                      | 0.53    |
| DELTA-NIHSS<br>(mean±SD)     | 9.0±7.8                      | 8.3± 8.2                     | 0.20    |
